# Supplementary material
Source: publisher figshare collection journal article supplement (https://acs.figshare.com/ndownloader/files/3902308)
Supplement: Supplementary file 1 [file 3902308]

Supporting Information:  
ERRATUM: Harmonic models in  
Cartesian and internal coordinates to  
simulate the absorption spectra of  
carotenoids at finite temperatures  
(*J. Chem. Theory Comput.*, **2013**, *9*, 4947-4958)

Javier Cerezo<sup>1,2</sup>, José Zúñiga<sup>2</sup>, Alberto Requena<sup>2</sup>,  
Francisco J. Ávila Ferrer<sup>1,3</sup> and Fabrizio Santoro<sup>1</sup>

1) CNR–Consiglio Nazionale delle Ricerche, Istituto di Chimica dei Composti  
Organo Metallici (ICCOM-CNR), UOS di Pisa, Area della Ricerca, via G. Moruzzi  
1, I-56124 Pisa, Italy

2) Departamento de Química Física, Universidad de Murcia. 30100 Murcia.  
Spain

3) University of Málaga, Physical Chemistry, Faculty of Science, Málaga, 29071,  
Spain

Table 1: Largest normal mode displacements (atomic units) for low-frequency modes computed for *cis*- $C_i$  conformer of  $\beta$ -carotene. Values for AH-int model reported in the original paper (orig) as well as the corrected ones (corr) are included along with those provided by the AH and VH models in Cartesian coordinates. Significant changes are observed between the original and the corrected values.

| Mode           | Freq   | Displacement  |               |               |                |
|----------------|--------|---------------|---------------|---------------|----------------|
|                |        | VH            | AH Cart       | AH int (orig) | AH int (corr)  |
| 3 <sup>a</sup> | 13.89  | <b>98.17</b>  | <b>316.68</b> | <b>324.54</b> | <b>317.41</b>  |
| 5              | 24.31  | -14.94        | -17.54        | 60.55         | -28.74         |
| 7              | 35.16  | 49.53         | -54.80        | 34.52         | -49.76         |
| 9 <sup>a</sup> | 45.56  | <b>265.69</b> | <b>103.98</b> | <b>121.48</b> | <b>-109.35</b> |
| 10             | 53.80  | -43.87        | -29.95        | -14.15        | -26.69         |
| 14             | 78.50  | 9.70          | 0.48          | 61.05         | -11.22         |
| 15             | 90.81  | 6.87          | 14.98         | -26.35        | -20.17         |
| 19             | 119.50 | 30.21         | 26.65         | 38.63         | -28.44         |
| 20             | 135.67 | -13.10        | -9.64         | -3.96         | 8.91           |
| 23             | 144.82 | -26.46        | -9.14         | -13.59        | 9.97           |

<sup>a</sup>Significantly contributed by the dihedral connecting the ionone ring with the polyenic chain.

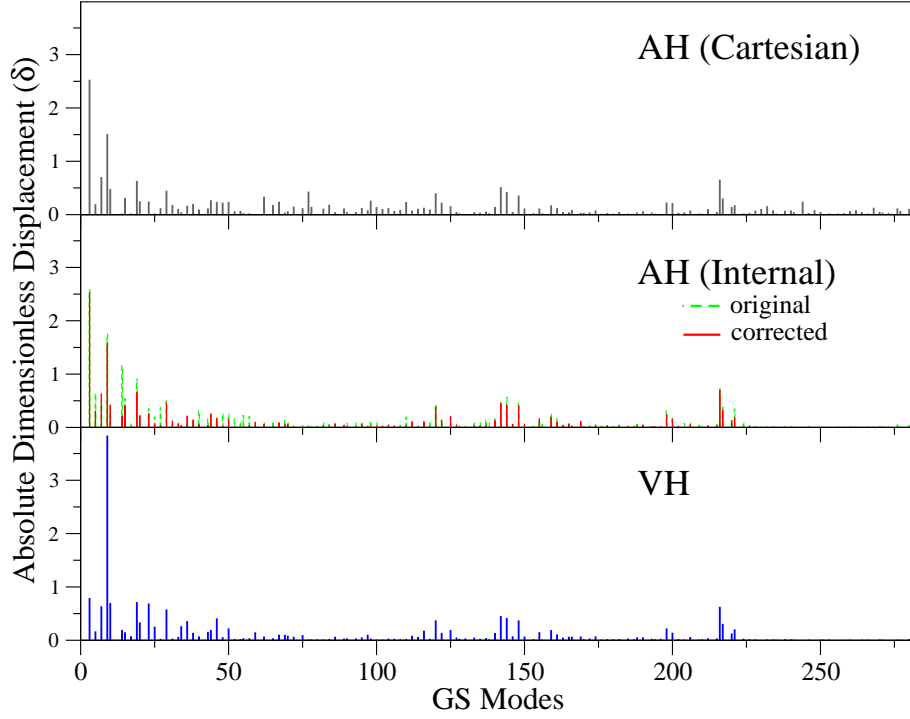

Figure 1: Absolute values of the dimensionless displacements,  $\delta_i = (2\pi\nu_i^{GS}/\hbar)^{1/2}K_i$ , computed with all the models for the *cis*- $C_i$  conformer of  $\beta$ -carotene. In the center panel, both the original (dotted) and the corrected (straight line) values for AH-int model are included. Corrected values are generally smaller, mainly for torsional normal modes (low frequency), although a similar performance still holds when comparing AH-Cart, AH-int and VH models.

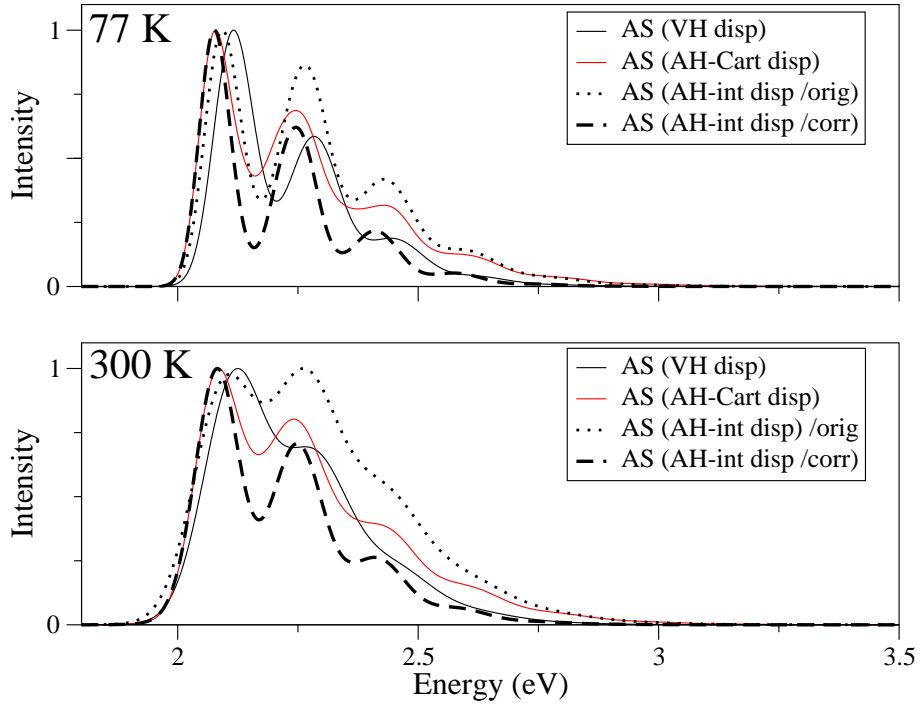

Figure 2: Adiabatic Shift (AS) spectra (i.e. setting Duschinsky matrix to the unit matrix) computed for the *cis*- $C_i$  isomer of  $\beta$ -carotene using the normal mode displacements evaluated at VH, AH-Cart, AH-int models. Corrected AH-int calculations predict vibronic spectra significantly different from the original ones, although a similar spectral width is observed in all the cases.

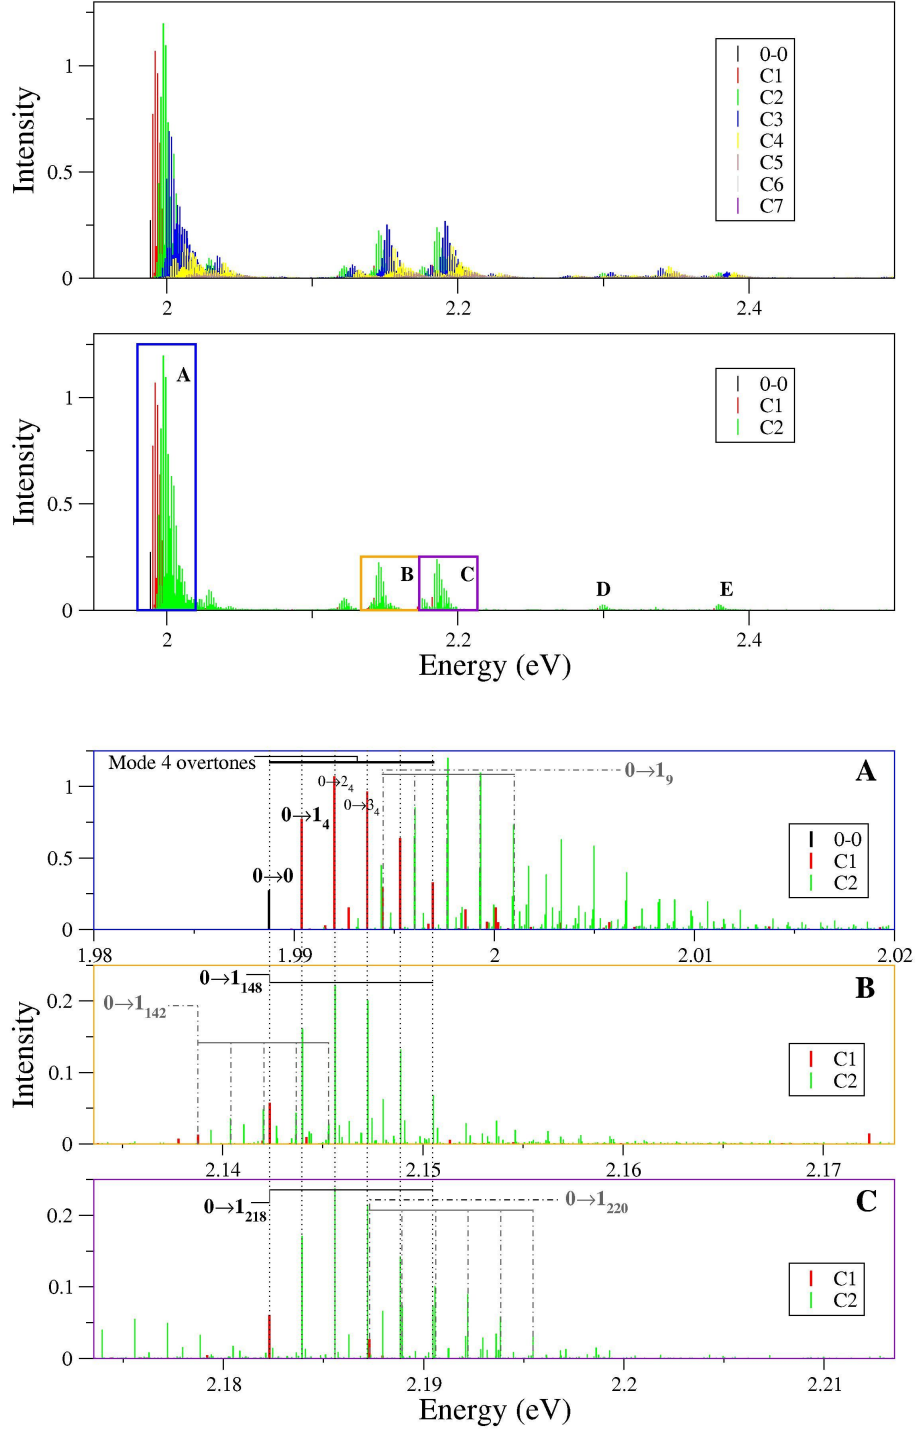

Figure 3: TI spectrum at 0 K (recovered fraction equal to 0.81), computed using internal coordinates with the corrected code. On the top, the contributions for all the computed *classes* are shown (up), and the selected regions with only  $C_0$  (0-0) to  $C_2$  *classes* transitions are indicated. A zoom on these regions is shown on the bottom panels. The same labels adopted in the original publication are used.
